# Supplementary material for: Structural characterization of mono-ruthenium substituted Keggin-type silicotungstates
Source: Royal Society of Chemistry journal article supplement (doi:10.1039/b606266k), 2006-01-01
Supplement: b606266k.pdf [file b606266k.pdf]

## **Structural Characterization of Mono-Ruthenium Substituted Keggin-type Silicotungstates<sup>¶</sup>**

**Masahiro Sadakane,<sup>a\*</sup> Daisuke Tsukuma,<sup>a</sup> Michael H. Dickmann,<sup>b</sup> Ulrich Kortz,<sup>b</sup> Michio Higashijima,<sup>c</sup> and Wataru Ueda<sup>a</sup>**

<sup>a</sup> Catalysis Research Center, Hokkaido University, N-21, W-10, Sapporo, 001-0021, Japan  
sadakane@cat.hokudai.ac.jp

<sup>b</sup> School of Engineering and Science, International University of Bremen, P. O. Box 750561, 28725 Bremen, Germany.

<sup>c</sup> Mitsubishi Chemical Co., 1 Toho-cho, Yokkaichi, 510-8530, Mie, Japan

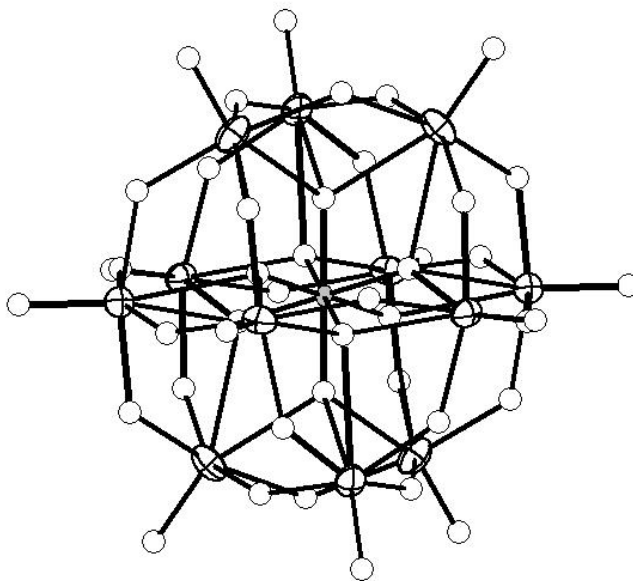

Figure S1. Disordered Keggin structure found in crystal of **1**.

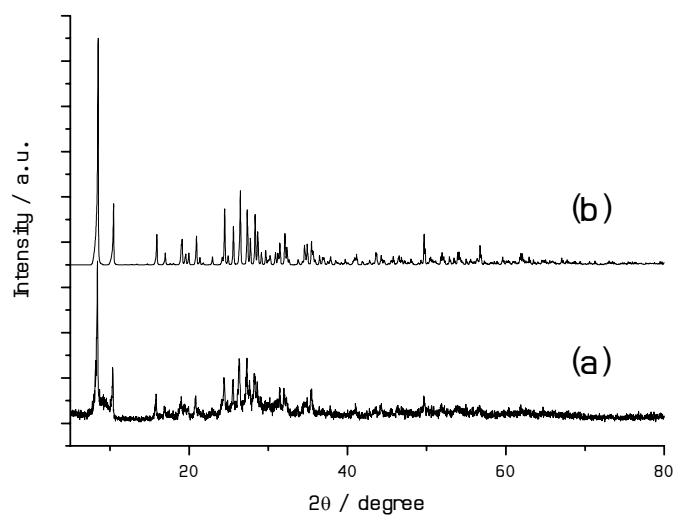

Figure S2. Experimental powder XRD pattern of prepared **1** (a) and simulated pattern using the single crystal structural data (b).

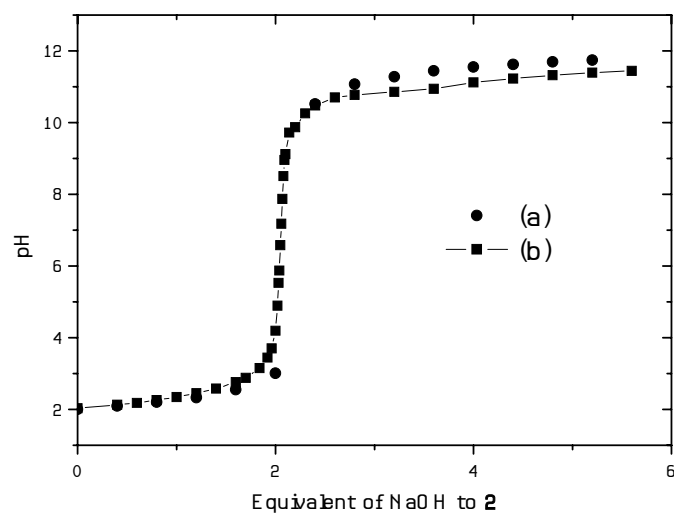

Figure S3. Titration of **2** with NaOH (a) without **2** and (b) 1 mM of **2** in 0.1 M NaClO<sub>4</sub> + 0.01 M HClO<sub>4</sub>

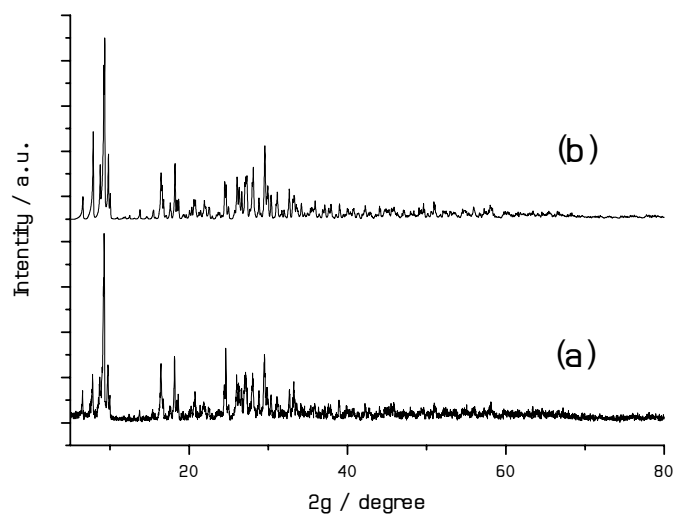

Figure S4. Experimental powder XRD pattern of prepared **2** (a) and simulated pattern using the single crystal structural data (b).
